# Supplementary material for: Biochar Alteration of the Sorption of Substrates and Products in Soil Enzyme Assays
Source: Hindawi journal article supplement (doi:10.1155/2013/968682), 2013-01-01
Supplement: f1 [file 968682.f1.pdf]

**Biochar alteration of the sorption of substrates and products in soil enzyme assays:**

**Supplementary material**

Authors: Mark A. Swaine\*, Rachel Obrike\*\*, Joanna M. Clark, Liz J Shaw†

Soil Research Centre, Department of Geography and Environmental Science, University of Reading, Reading, RG6 6DW, UK

†Corresponding author: Liz J Shaw; e-mail address: e.j.shaw@reading.ac.uk; Tel.: +44 (0)118 3786971; Fax: +44 (0)118 3786660

\*Present address: SRUC, Crop and Soil Systems Research Group, West Mains Road, Edinburgh, EH9 3JG, UK.

\*\*Present address: Reading Scientific Services Ltd., Reading Science Centre, University of Reading, Reading, RG6 6LA, UK.

## Supplementary Material

### Additional methodological details

*Conversion of p-nitrophenyl phosphate (pNPP) to p-nitrophenol (pNP) using alkaline bovine phosphatase.*

To quantify pNPP concentrations in experiments examining biochar effects on the concentration of pNPP under enzyme assay incubation conditions, alkaline bovine phosphatase (Sigma-Aldrich) was used to convert pNPP to pNP. The concentration of the yellow pNP chromophore produced could be quantified using a spectrophotometer (400 nm) and the effect of biochar on pNPP concentration calculated from pNP concentration data with the knowledge that 1 mole of pNPP is hydrolysed to 1 mole of pNP. After removal of soil from pNPP incubations by centrifugation (see section '*Biochar effects on concentrations of assay substrates and products*', main text) supernatant (0.3 ml) was added to 2.7 ml Diethanolamine (DEA) buffer (1 M in 0.5 mM MgCl<sub>2</sub>; pH 9.8) to which 0.1 ml bovine phosphatase (0.1 unit ml<sup>-1</sup>) was added. Samples were incubated (37 °C) for 16 hours, a time shown in preliminary experiments (Fig. S1) to be sufficient to allow complete hydrolysis of the maximum theoretical amount of pNPP possible in the enzyme mix (0.3 ml x 23 μmol ml<sup>-1</sup> = 6.9 μmol). After incubation, the concentration of pNP in 1/50 diluted samples was determined spectrophotometrically at 400 nm (Cecil CE 292 digital ultraviolet spectrophotometer series 2) against a 1/50 diluted blank of DEA buffer. Enzyme-only and pNPP-only controls were included in the incubations.

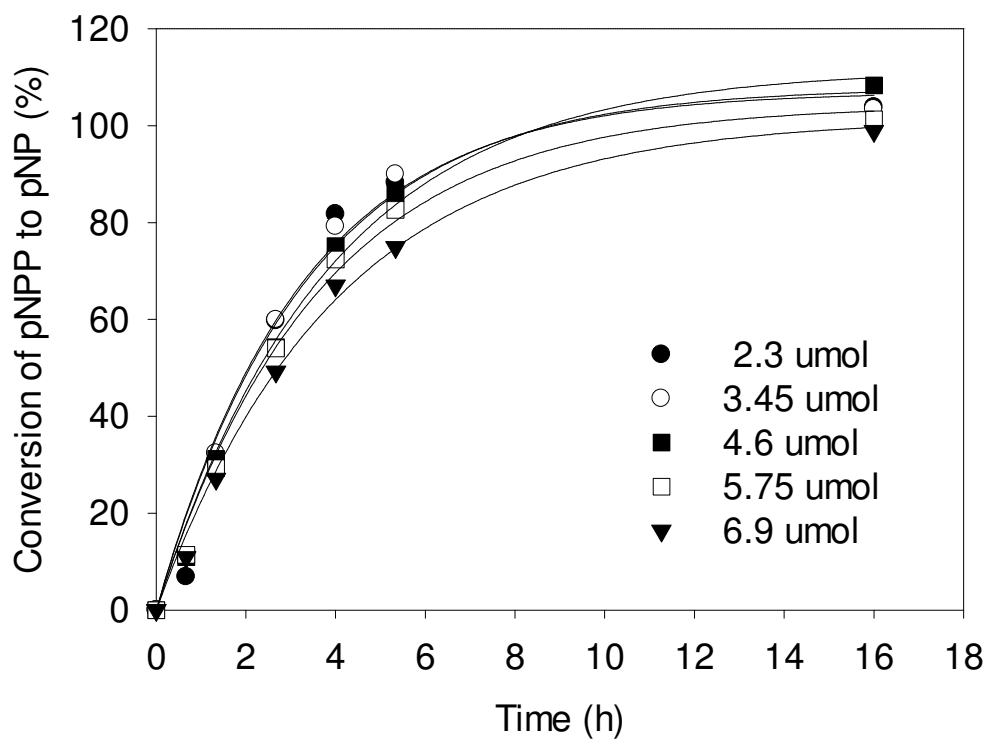

**Figure S1.** Kinetics of conversion of differing amounts (2.3  $\mu$ moles to 6.9  $\mu$ moles) of p-nitrophenyl phosphate (pNPP) to p-nitrophenol (pNP) using alkaline bovine phosphatase as quantified by spectrophotometric detection (400 nm) of pNP production. Production of pNP was negligible in enzyme-only and pNPP-only controls; control data are not plotted for clarity.
